# Supplementary material for: Porphyrin–ferrocene conjugates for photodynamic and chemodynamic therapy
Source: Royal Society of Chemistry journal article supplement (doi:10.1039/c8ob02391c), 2018-01-01
Supplement: c8ob02391c1.pdf [file c8ob02391c1.pdf]

Supplementary Information (SI):

## **Porphyrin-ferrocene conjugates for photodynamic and chemodynamic Therapy**

*Zhitao Lei,<sup>ab</sup> Xiaoyu Zhang\*,<sup>a</sup> Xiaohua Zheng,<sup>bc</sup> Shi Liu,<sup>b</sup> and Zhigang Xie\*<sup>b</sup>*

*<sup>a</sup>College of Environmental and Chemical Engineering, Yanshan University, 438 Heibei Avenue, Qinhuangdao, Hebei 066004, P. R. China. E-mail: xiaoyuzhang@ysu.edu.cn*

*<sup>b</sup>State Key Laboratory of Polymer Physics and Chemistry, Changchun Institute of Applied Chemistry, Chinese Academy of Sciences, Changchun 130022 (P. R. China)  
E-mail: xiez@ciac.ac.cn*

*<sup>c</sup>University of Science and Technology of China, Hefei 230026, P. R. China.*

### Synthetic procedures of TPP-NH<sub>2</sub>

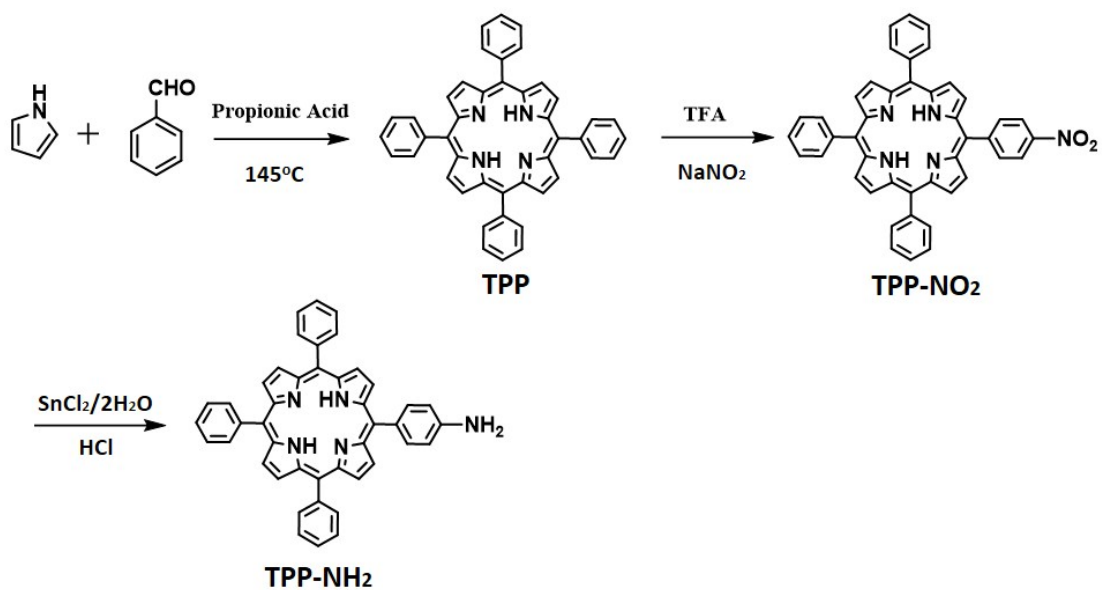

### Synthetic procedures of TNCF

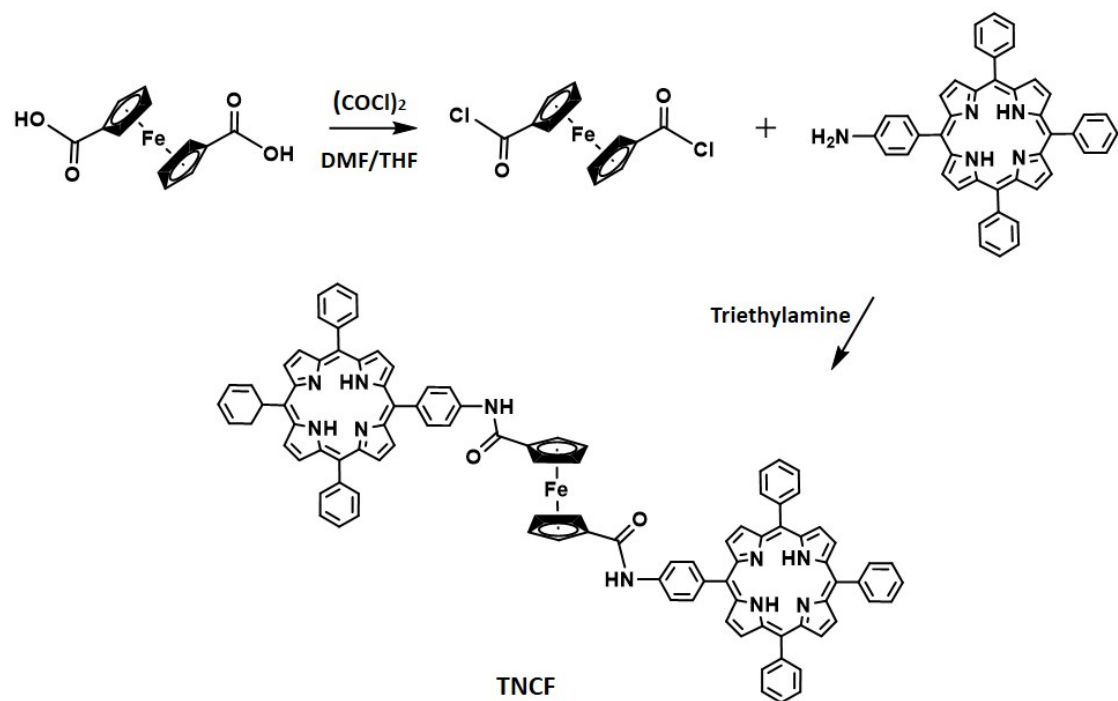

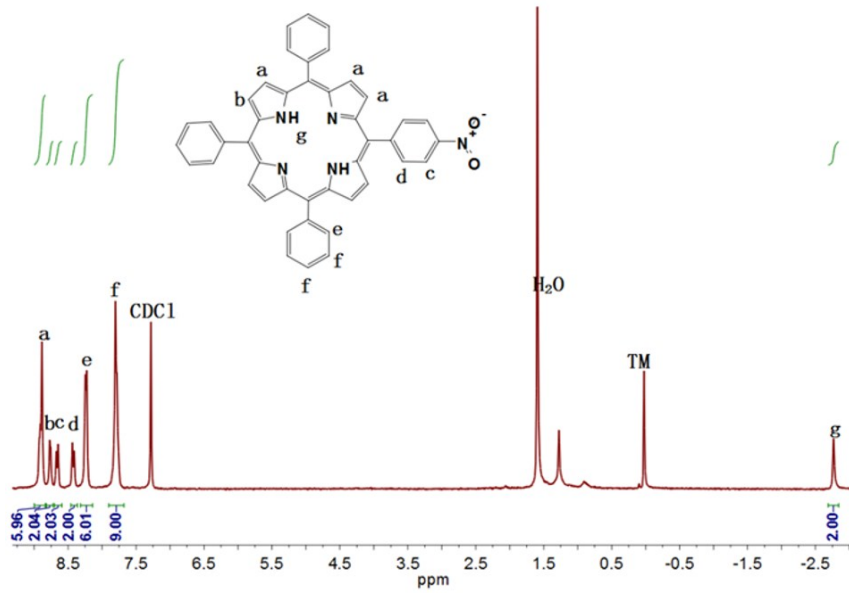

**Figure S1.**  $^1\text{H}$  NMR spectrum of TPP-NO<sub>2</sub>.

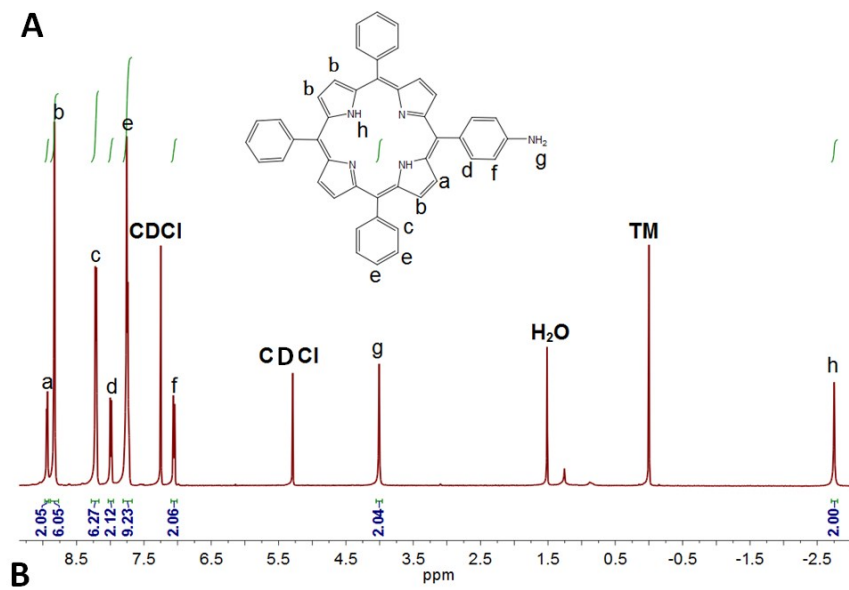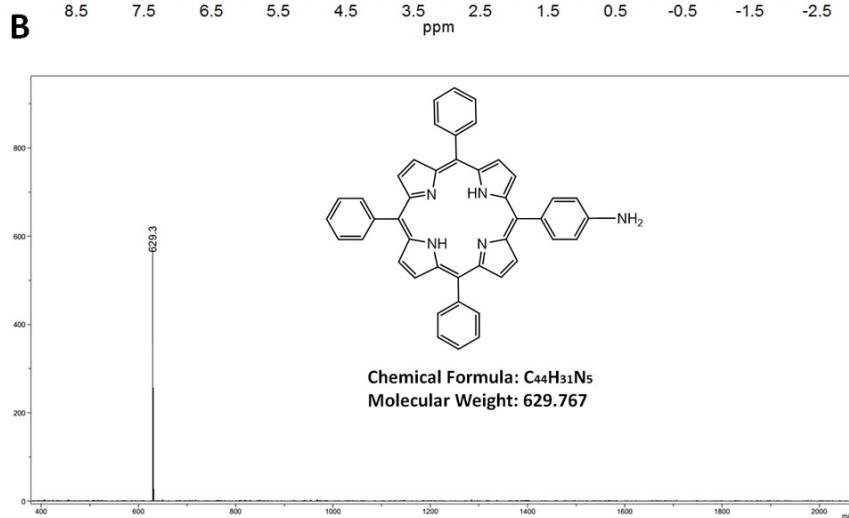

**Figure S2.** (A)  $^1\text{H}$  NMR spectrum of TPP-NH<sub>2</sub>. (B) MALDI-TOF mass spectrum of TPP-NH<sub>2</sub>.

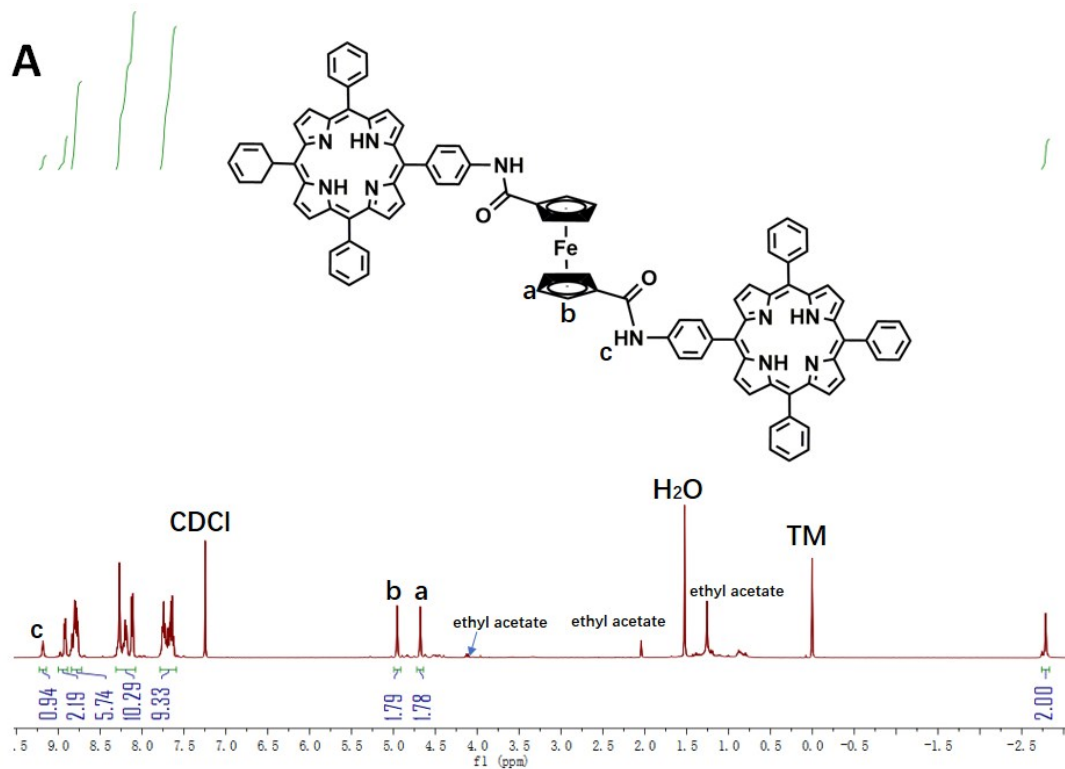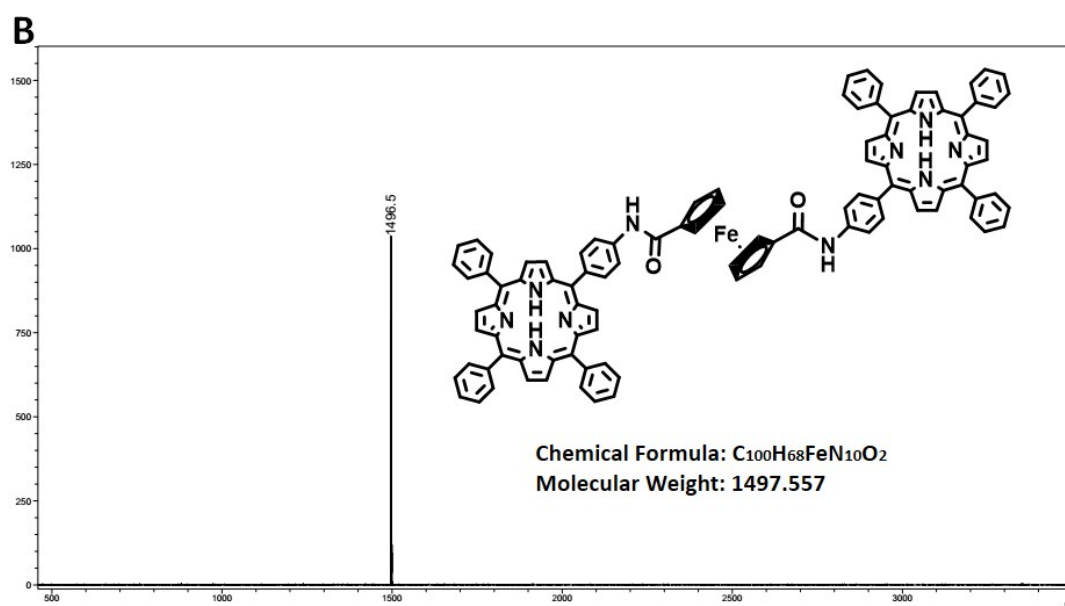

**Figure S3.** (A)  $^1\text{H}$  NMR spectrum of TNCF. (B) MALDI-TOF mass spectrum of TNCF.

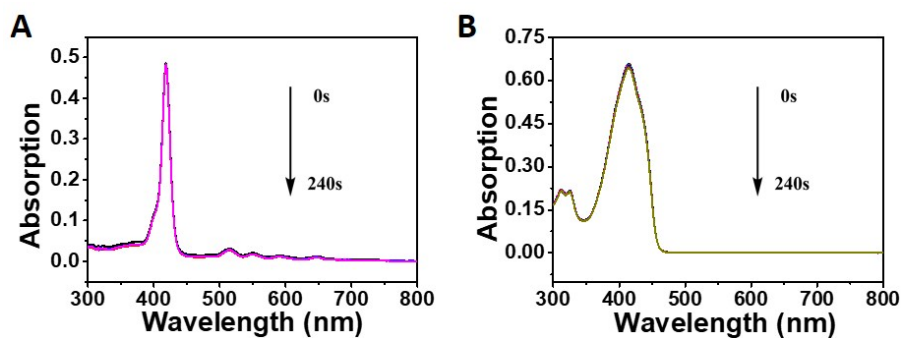

**Figure S4.** Time-dependent UV-vis absorption spectra of TNCF (A) and DPBF (B) upon irradiation with a 620 nm lamp irradiation (12 mW/cm<sup>2</sup>) from 0 to 240 s.

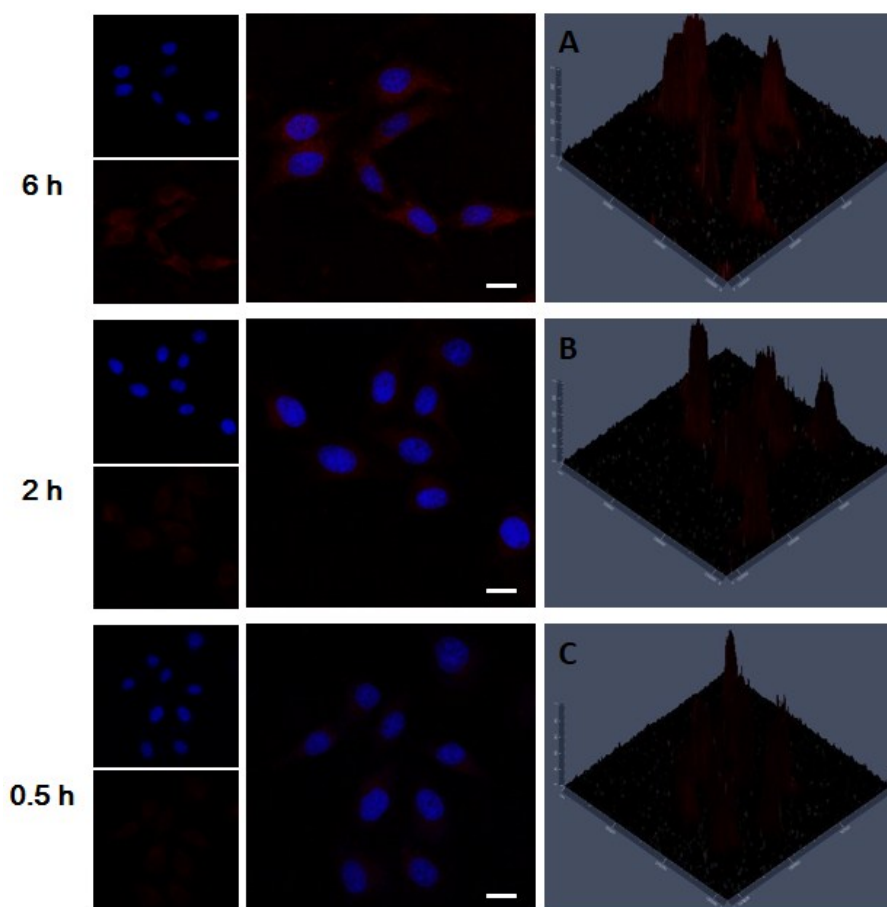

**Figure S5.** CLSM images of MCF-7 cells incubated with TNCF under the condition of 37°C. For each panel, the images show cell nuclei stained by DAPI (blue), fluorescence of TNCF (red) and overlays of three images. Scale bars, 20  $\mu$ m. Fluorescence of TNCF and Lyso-tracker Red in cells at 2.5D mode (A-C).

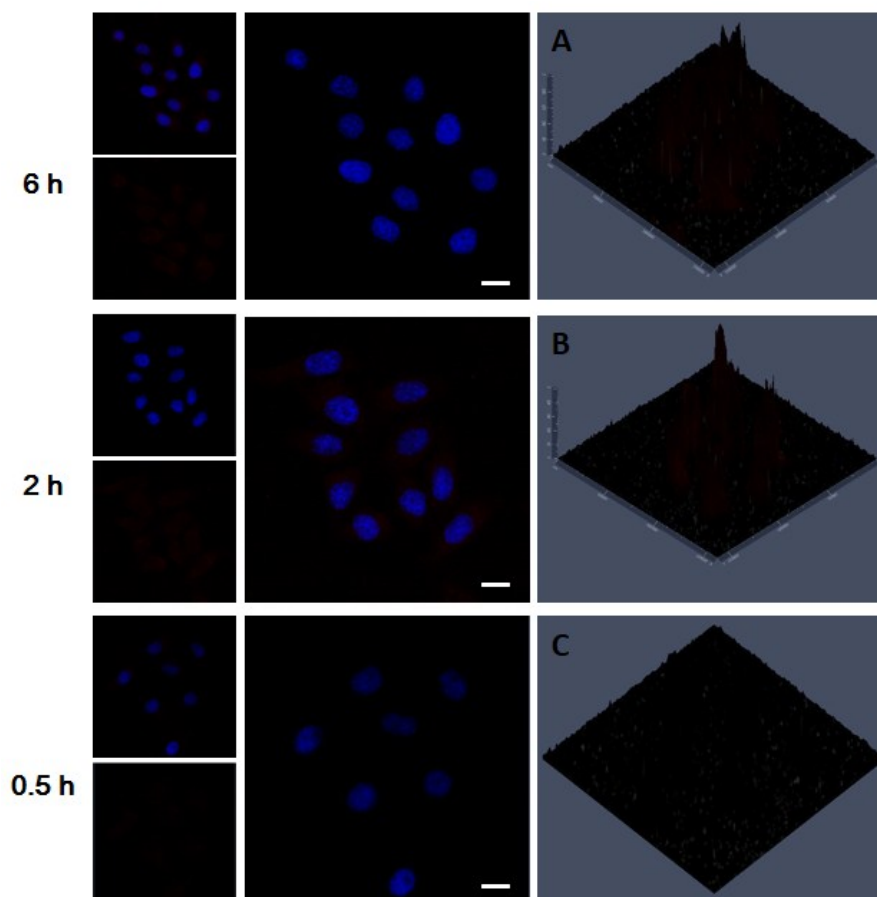

**Figure S6.** CLSM images of MCF-7 cells incubated with TNCF under the condition of 4°C. For each panel, the images show cell nuclei stained by DAPI (blue), fluorescence of TNCF (red) and overlays of three images. Scale bars, 20 μm. Fluorescence of TNCF and Lyso-tracker Red in cells at 2.5D mode (A-C).

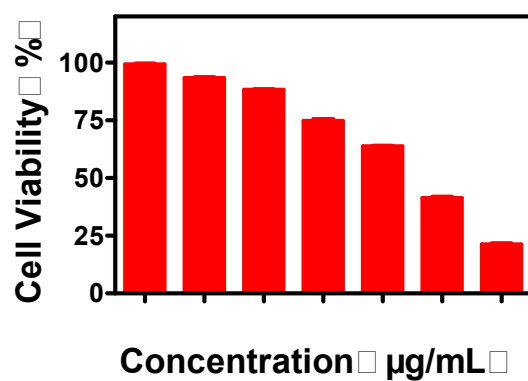

**Figure S7.** Cell viabilities of MCF-7 cells treated with H<sub>2</sub>O<sub>2</sub> at various concentrations.

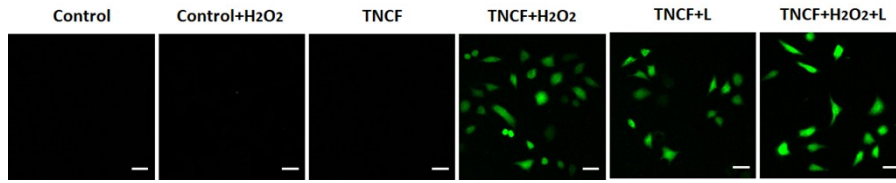

**Figure S8.** Generation of ROS in vitro (HeLa) under different treatments denoted by the fluorescence of DCF. Scale bars, 20 μm.
